# Supplementary figures and images for: Dynamic dichotomy of accumbal population activity underlies cocaine sensitization
Source: eLife journal article supplement (doi:10.7554/elife.66048), 2021-10-05

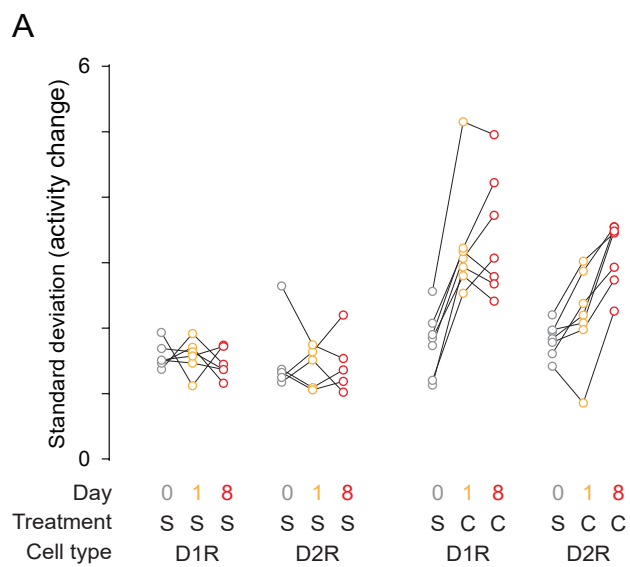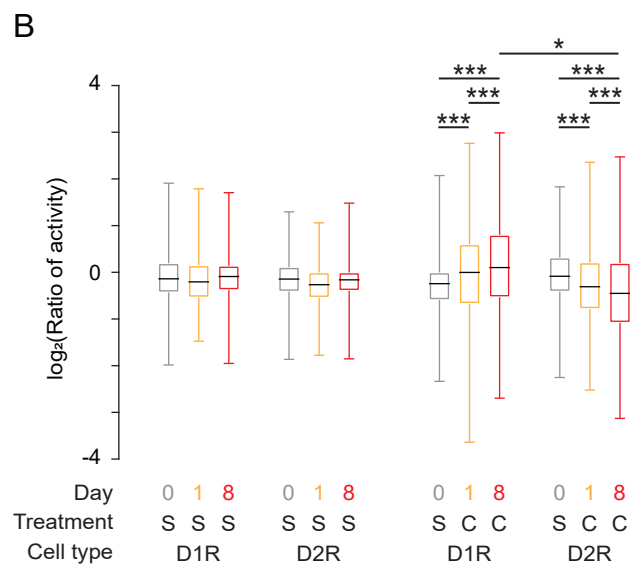

Supplement: supp [file elife-66048-supp-v1.zip]

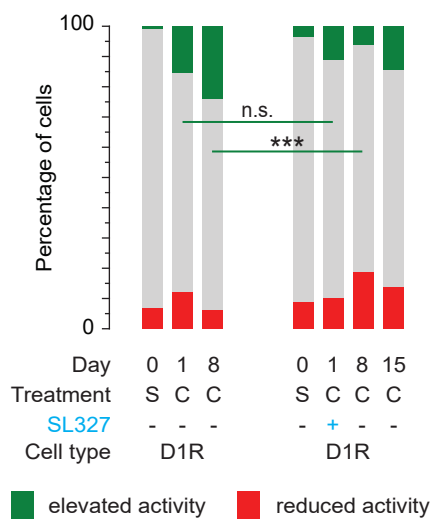

Supplement: supp [file elife-66048-supp-v1.zip]

A

NAc D1R

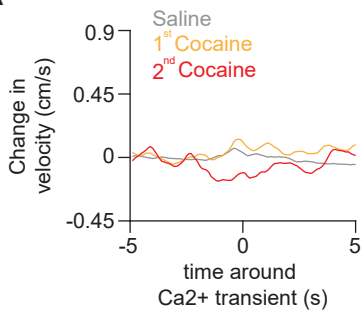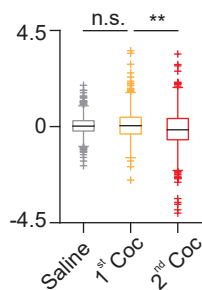

B

NAc D2R

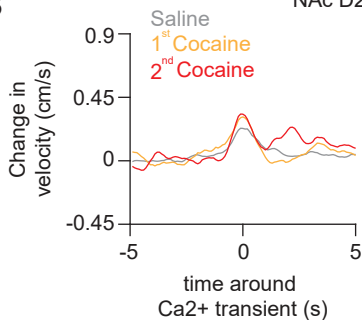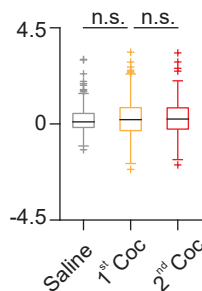

C

dStr D1r

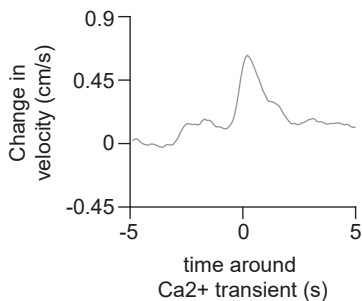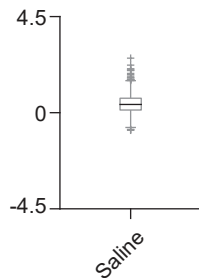

Supplement: supp [file elife-66048-supp-v1.zip]

A

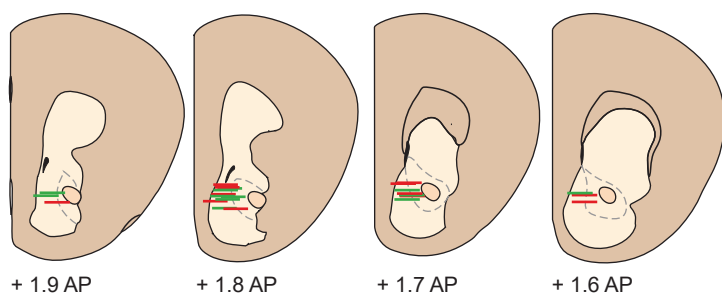

B

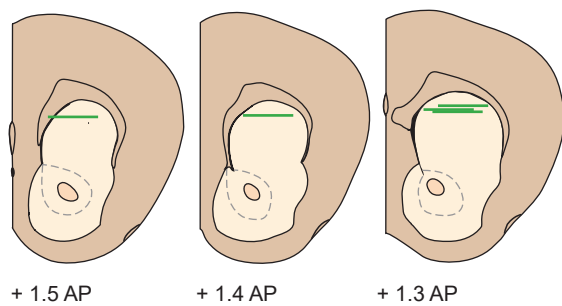

C

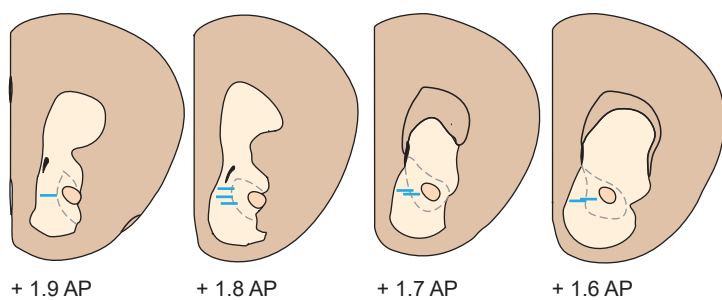

D

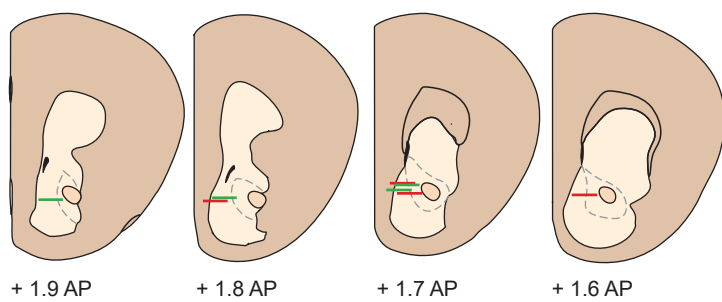

E

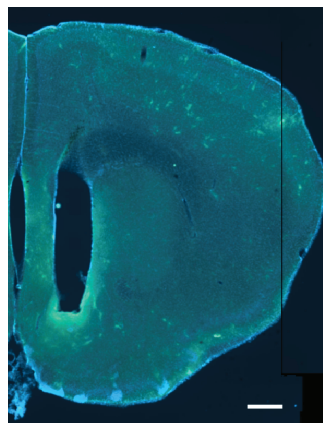

Supplement: supp [file elife-66048-supp-v1.zip]

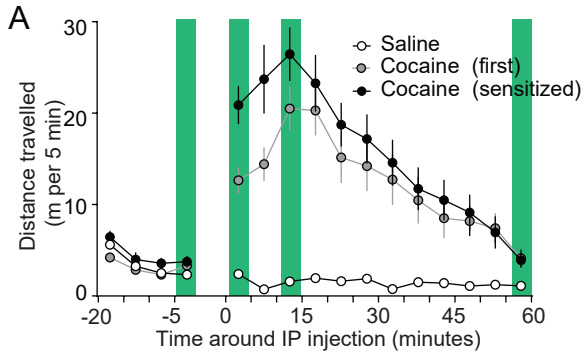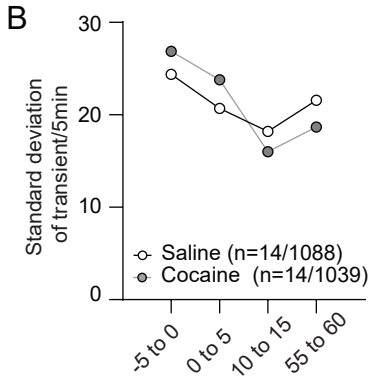

Supplement: supp [file elife-66048-supp-v1.zip]
